# Supplementary material for: Cyclic tetravinylsiloxanetetraols as hybrid inorganic–organic thiol-ene networks
Source: Royal Society of Chemistry journal article supplement (doi:10.1039/c2jm15484f), 2012-01-01
Supplement: c2jm15484f.pdf [file c2jm15484f.pdf]

## Supporting Information

### Cyclic Tetravinylsiloxanetetraols as Hybrid Inorganic-Organic Thiol-ene Networks

*Bradley J. Sparks,<sup>1</sup> Timothy J. Kuchera,<sup>1</sup> Matthew J. Jungman,<sup>1</sup> Adam D. Richardson,<sup>1</sup> Daniel A. Savin,<sup>1</sup> Sukhendu Hait,<sup>2</sup> Joseph Lichtenhan,<sup>2</sup> Mary F. Striegel<sup>3</sup> and Derek L. Patton<sup>1\*</sup>*

<sup>1</sup>School of Polymers and High Performance Materials  
University of Southern Mississippi  
118 College Drive #5050  
Hattiesburg, MS. 39406-0001

<sup>2</sup>Hybrid Plastics, Inc.  
55 W.L. Runnels Industrial Drive  
Hattiesburg, MS 39401

<sup>3</sup>Materials Conservation  
National Center for Preservation Technology and Training  
645 University Parkway, Natchitoches LA 71457

AUTHOR EMAIL ADDRESS: [derek.patton@usm.edu](mailto:derek.patton@usm.edu)

<sup>29</sup>Si NMR:

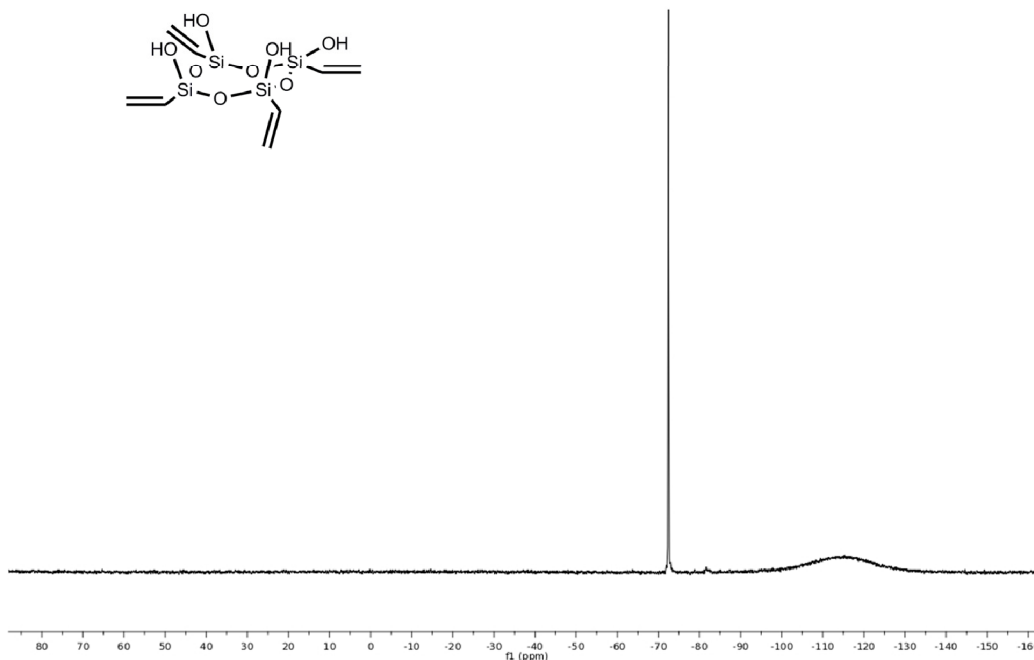

**Figure S1.** <sup>29</sup>Si NMR of [Vi(OH)SiO]<sub>4</sub>

## Supporting Information

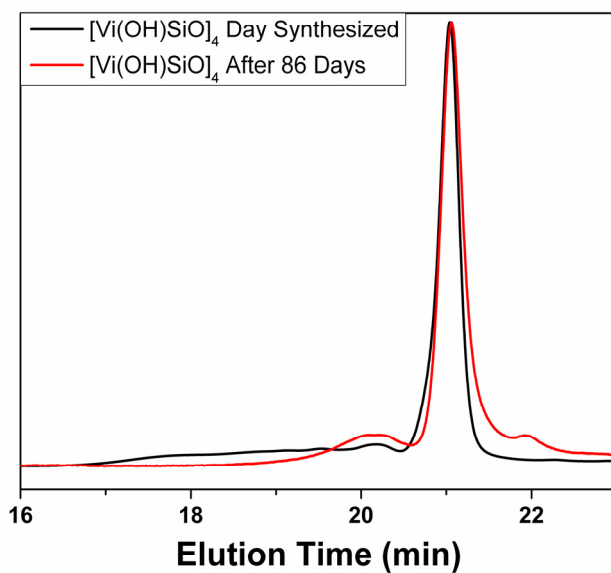

**Figure S2.** GPC refractive index traces showing the gradual degradation/condensation of  $[\text{Vi}(\text{OH})\text{SiO}]_4$  over a period of 86 days.

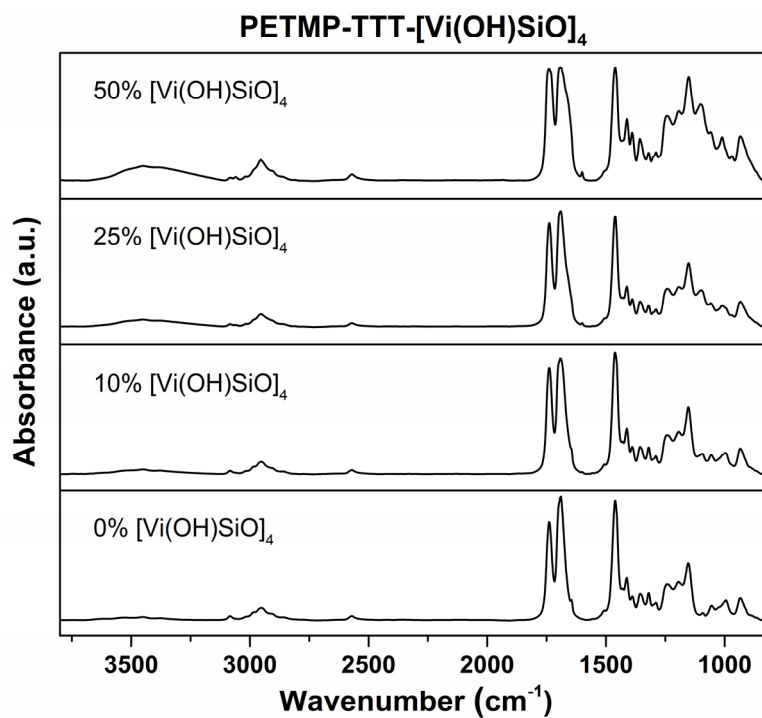

**Figure S3.** FTIR spectra of uncured TTT-PETMP- $[\text{Vi}(\text{OH})\text{SiO}]_4$  formulations.

## Supporting Information

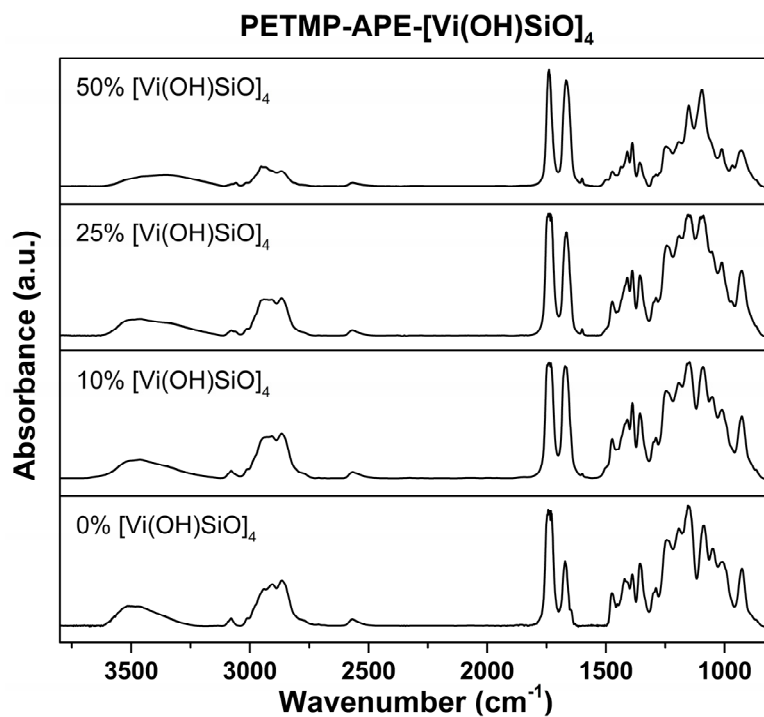

**Figure S4.** FTIR spectra of uncured APE-PETMP-[Vi(OH)SiO]<sub>4</sub> formulations.

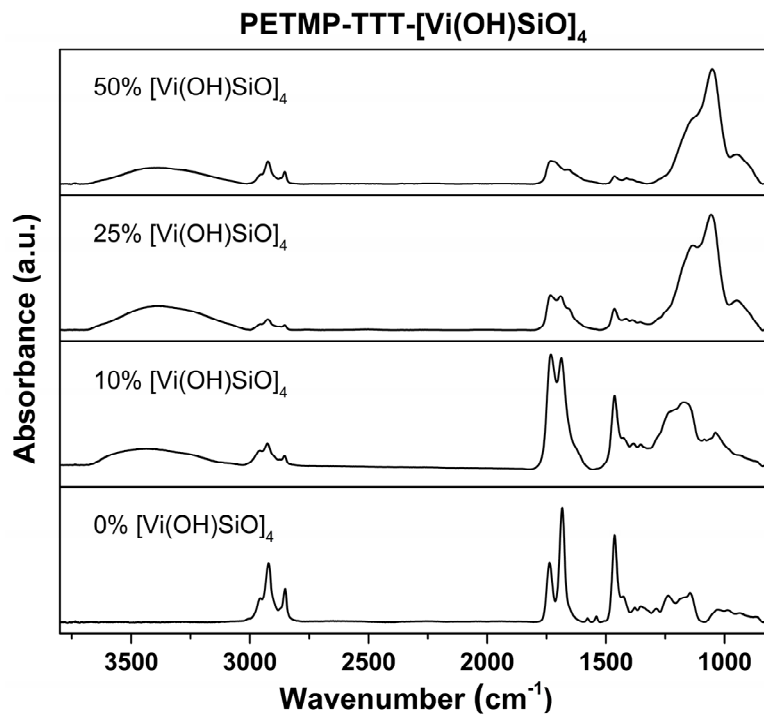

**Figure S5.** gATR-FTIR spectra of photocured TTT-PETMP-[Vi(OH)SiO]<sub>4</sub> formulations.

### Supporting Information

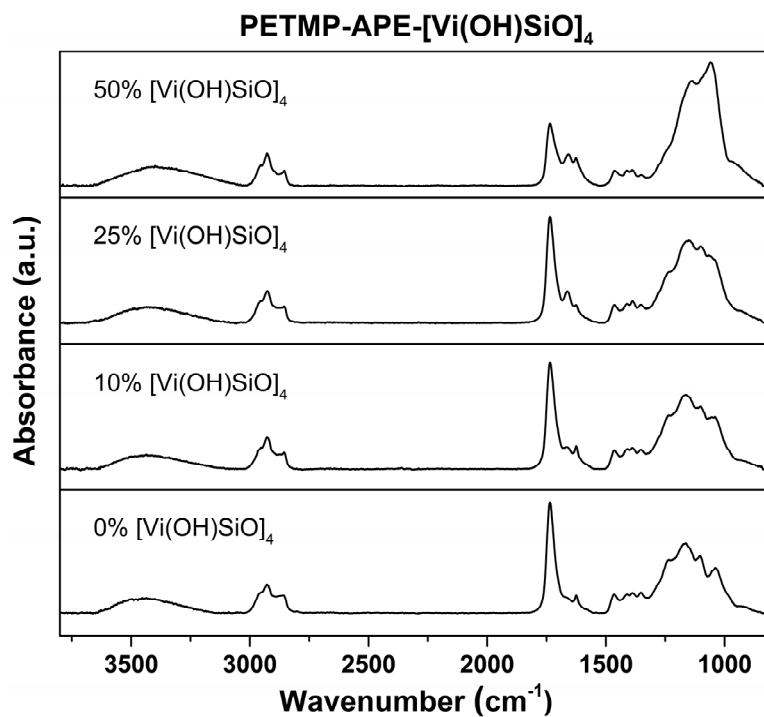

**Figure S6.** gATR-FTIR spectra of photocured APE-PETMP-[Vi(OH)SiO]<sub>4</sub> formulations.
